# Supplementary material for: Transplacental Therapeutic Drug Monitoring in Pregnant Women with Fetal Tachyarrhythmia Using HPLC-MS/MS
Source: MDPI journal article supplement (doi:10.3390/ijms24031848), 2023-01-17

Table S1. The concentration of digoxin (ng/ml) in blood serum, urine and amniotic fluid at the observation points depending on the genotyping data of the pregnant woman according to ABCB1.

| Groups of study, ng/ml                                     | CC             | Allele T      | p-value |
|------------------------------------------------------------|----------------|---------------|---------|
| <b>1<sup>st</sup> point</b>                                |                |               |         |
| Digoxin in blood*                                          | 1.5±0.5        | 1.7±0.6       | 0.583   |
| Digoxin in urine**                                         | 459 (320;665)  | 579 (382,743) | 0.354   |
| Digoxin in amniotic fluid**                                | 2.3 (1.9;2.6)  | 2.3 (1.3;3.5) | 0.844   |
| <b>2<sup>nd</sup> point</b>                                |                |               |         |
| Digoxin in blood**                                         | 1.7 (1.2; 1.7) | 1.8 (1.5; 2)  | 0.159   |
| Digoxin in urine*                                          | 600±200        | 700±300       | 0.448   |
| Digoxin in amniotic fluid*                                 | 2.1±0.8        | 4±2           | 0.127   |
| <b>3<sup>rd</sup> point</b>                                |                |               |         |
| Digoxin in blood*                                          | 1.9±0.3        | 1.8±0.5       | 0.681   |
| Digoxine in urine*                                         | 900±200        | 600±400       | 0.12    |
| <b>4<sup>th</sup> point (Delivery)</b>                     |                |               |         |
| Digoxine in blood*                                         | 1.0±0.5        | 1.1±0.8       | 0.733   |
| Digoxin in urine*                                          | 500±500        | 300±200       | 0.203   |
| Digoxin in amniotic blood*                                 | 4.1±0.3        | 4±2           | 0.86    |
| Digoxin in newborn blood*                                  | 0.4±0.2        | 0.5±0.4       | 0.265   |
| *The data presented as M±SD (95% c.i.), variance analysis. |                |               |         |
| **The data presented as Me(Q1;Q3), Mann-Withey criteria    |                |               |         |

Table S2. Intra- and interday precision and accuracy HPLC-MS/MS experiments (three different days) at four digoxin/sotalol concentrations (LOQ, low QC, medium QC, and high QC) in plasma, urine and amniotic fluid.

| Analyte | Matrix | QC, type  | QC, concentration, ng/ml (digoxin) and µg/ml (sotalol) | Intraday precision (RSD, %, n=5) |          |          | Intraday accuracy (%, n=5) |                |                | Interday precision (RSD, %,1) | Interday accuracy (%, n=3) |
|---------|--------|-----------|--------------------------------------------------------|----------------------------------|----------|----------|----------------------------|----------------|----------------|-------------------------------|----------------------------|
|         |        |           |                                                        | 1 day                            | 2 day    | 3 day    | 1 day                      | 2 day          | 3 day          |                               |                            |
| Digoxin | Plasma | LOQ       | 0.6                                                    | 3.7<br>6                         | 2.2<br>4 | 1.8<br>0 | -<br>8.2<br>2              | -<br>11.<br>15 | -<br>12.<br>90 | 3.10                          | -10.80                     |
|         |        | low QC    | 1.8                                                    | 7.9<br>4                         | 6.4<br>7 | 4.2<br>5 | 5.3<br>2                   | -<br>3.3<br>8  | -<br>11.<br>43 | 9.10                          | -3.20                      |
|         |        | medium QC | 5.0                                                    | 1.0<br>0                         | 2.8<br>9 | 6.3<br>0 | -<br>14.<br>06             | -<br>10.<br>72 | -<br>9.0<br>7  | 4.20                          | -11.30                     |

|         |                |           |       |           |           |           |           |                |                |       |       |
|---------|----------------|-----------|-------|-----------|-----------|-----------|-----------|----------------|----------------|-------|-------|
|         |                | high QC   | 7.5   | 7.9<br>1  | 1.9<br>3  | 9.7<br>5  | 1.6<br>5  | -<br>12.<br>90 | 1.0<br>1       | 9.60  | -3.40 |
| Sotalol | Plasma         | LOQ       | 0.2   | 2.9<br>8  | 1.0<br>7  | 14.<br>40 | 15.<br>33 | 18.<br>43      | 0.6<br>2       | 12.00 | 11.50 |
|         |                | low QC    | 0.6   | 9.3<br>0  | 5.3<br>8  | 2.9<br>3  | 3.8<br>1  | 6.3<br>9       | 12.<br>41      | 10.40 | -0.70 |
|         |                | medium QC | 5.0   | 10.<br>65 | 2.2<br>0  | 3.0<br>3  | 6.6<br>9  | 11.<br>52      | 11.<br>40      | 12.10 | 2.30  |
|         |                | high QC   | 7.5   | 5.9<br>0  | 5.6<br>8  | 10.<br>12 | 5.7<br>4  | 4.3<br>5       | -<br>6.1<br>4  | 8.90  | 1.30  |
|         |                |           |       |           |           |           |           |                |                |       |       |
| Digoxin | Urine          | LOQ       | 10.0  | 0.2<br>4  | 1.7<br>2  | 1.3<br>4  | 14.<br>12 | 12.<br>74      | 11.<br>89      | 12.60 | 4.50  |
|         |                | low QC    | 25.0  | 10.<br>72 | 12.<br>16 | 8.7<br>1  | 7.4<br>2  | 1.6<br>2       | 6.3<br>2       | 10.90 | 0.00  |
|         |                | medium QC | 200.0 | 6.6<br>9  | 8.5<br>2  | 8.1<br>1  | 4.5<br>9  | -<br>2.7<br>0  | -<br>8.4<br>5  | 7.90  | -3.10 |
|         |                | high QC   | 500.0 | 10.<br>25 | 6.7<br>8  | 6.5<br>1  | 6.6<br>9  | -<br>4.5<br>2  | -<br>6.8<br>7  | 9.60  | -1.60 |
| Sotalol | Urine          | LOQ       | 10.0  | 2.0<br>3  | 5.5<br>5  | 7.6<br>6  | 13.<br>20 | -<br>5.5<br>2  | -<br>2.7<br>1  | 6.70  | -7.10 |
|         |                | low QC    | 30.0  | 1.3<br>8  | 2.1<br>3  | 8.4<br>0  | 13.<br>41 | -<br>13.<br>21 | -<br>4.7<br>1  | 12.30 | -1.50 |
|         |                | medium QC | 500.0 | 1.2<br>4  | 5.3<br>9  | 7.2<br>5  | 12.<br>52 | -<br>0.6<br>8  | -<br>6.8<br>9  | 7.70  | 6.20  |
|         |                | high QC   | 750.0 | 3.2<br>1  | 2.2<br>2  | 9.4<br>7  | 12.<br>09 | 10.<br>46      | -<br>1.5<br>9  | 8.70  | 7.00  |
| Digoxin | Amniotic fluid | LOQ       | 0.5   | 4.6<br>3  | 4.9<br>9  | 2.1<br>5  | 5.1<br>5  | -<br>5.4<br>4  | -<br>12.<br>70 | 8.20  | -4.30 |
|         |                | low QC    | 1.5   | 7.6<br>7  | 7.0<br>5  | 11.<br>66 | 7.0<br>5  | -<br>6.3<br>7  | -<br>1.5<br>2  | 9.20  | -4.00 |
|         |                | medium QC | 5.0   | 4.6<br>8  | 6.8<br>9  | 10.<br>60 | 9.1<br>6  | -<br>7.6<br>7  | -<br>0.3<br>9  | 8.30  | -5.50 |
|         |                | high QC   | 7.5   | 2.4<br>6  | 4.5<br>0  | 8.3<br>4  | 12.<br>81 | -<br>9.1<br>8  | -<br>1.5<br>5  | 7.90  | -6.80 |

|         |                |           |     |       |       |       |       |      |      |       |       |
|---------|----------------|-----------|-----|-------|-------|-------|-------|------|------|-------|-------|
| Sotalol | Amniotic fluid | LOQ       | 0.2 | 13.33 | 11.21 | 8.35  | 6.65  | 0.68 | 7.10 | 11.90 | -0.10 |
|         |                | low QC    | 0.6 | 5.67  | 10.14 | 6.92  | 10.59 | 6.71 | 5.18 | 7.70  | 7.50  |
|         |                | medium QC | 5.0 | 7.77  | 4.17  | 11.21 | 7.75  | 6.47 | 4.33 | 9.60  | 3.30  |
|         |                | high QC   | 7.5 | 5.40  | 3.77  | 4.85  | 10.29 | 6.81 | 6.54 | 4.80  | 7.90  |

Table S3. Matrix effect and extraction recovery results for three QC levels (LOQ, medium QC, and high QC).

| Analyte | Matrix | Matrix effect (ME, n=3), % |           |         | Recovery (ME, n=3), % |           |         |
|---------|--------|----------------------------|-----------|---------|-----------------------|-----------|---------|
|         |        | LLOQ                       | Medium QC | High QC | LLOQ                  | Medium QC | High QC |
| Digoxin | Plasma | 76                         | 110       | 95      | 75                    | 96        | 78      |
|         | Urine  | 85                         | 92        | 89      | 80                    | 97        | 85      |
| Sotalol | Plasma | 81                         | 114       | 88      | 77                    | 98        | 85      |
|         | Urine  | 88                         | 83        | 94      | 81                    | 83        | 101     |

Table S4. The results of HPLC-MS/MS MRM methods validation.

| Analyte                                   | Digoxin             |                       |                       | Sotalol               |                       |                       |
|-------------------------------------------|---------------------|-----------------------|-----------------------|-----------------------|-----------------------|-----------------------|
| Matrix                                    | Plasma              | Amniotic fluid        | Urine                 | Plasma                | Amniotic fluid        | Urine                 |
| Calibration curve, equation               | $y=0.39034*x-0.989$ | $y=0.18864*x+0.01461$ | $y=0.01519*x+0.00919$ | $y=0.29340*x+0.02059$ | $y=0.19969*x+0.00537$ | $y=0.01417*x-0.00754$ |
| Calibration curve, r                      | 0.99605             | 0.99868               | 0.99537               | 0.99419               | 0.99397               | 0.99325               |
| LLOD, ng/ml (digoxin) and µg/ml (sotalol) | 0.2                 | 0.2                   | 7.5                   | 0.2                   | 0.2                   | 7.7                   |
| LLOQ, ng/ml (digoxin) and µg/ml (sotalol) | 0.2                 | 0.5                   | 7.5                   | 0.2                   | 0.2                   | 10.0                  |
| Selectivity (STD of the peak area, %)     | 14.5                | 10.5                  | 10.5                  | 12.5                  | 9.6                   | 9.6                   |
| Matrix effect                             | 93.7±13.9           | 95.0±4.9              | 95.0±4.9              | 91.3±10.1             | 98.0±11.4             | 98.0±11.4             |

|                                               |               |            |             |              |             |             |
|-----------------------------------------------|---------------|------------|-------------|--------------|-------------|-------------|
| (ME±STD),<br>%                                |               |            |             |              |             |             |
| Recovery<br>(ME±STD),<br>%                    | 82±7.2        | 89.7±5.2   | 89.7±5.2    | 86.7±8.7     | 88.7±8.7    | 88.7±8.7    |
| Accuracy,<br>%                                | (-11.5; -3.2) | (-6.8; -4) | (-3.1; 4.5) | (-0.7; 11.5) | (-0.1; 7.9) | (-7.1, 7)   |
| Precision,<br>%                               | (3.1; 9.6)    | (7.9; 9.2) | (7.9; 12.6) | (8.9; 12.1)  | (4.8; 11.9) | (6.7; 12.3) |
| Robustness<br>(STD of the<br>peak area,<br>%) | 4.0           | 1.5        | 1.5         | 3.5          | 2.0         | 2.0         |

FigureS1: Calibration curve for digoxin in amniotic fluid. Healthy women urine was used as a matrix.

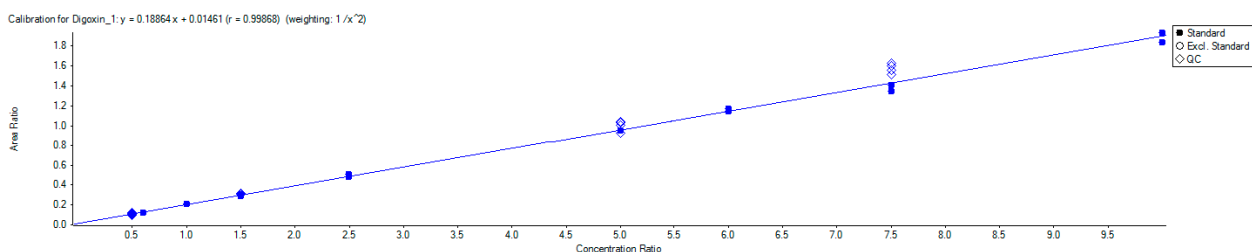

FigureS2: Chromatograms for blank and samples in amniotic fluid for digoxin. The healthy women urine was used as a blank.

1 – Samples:

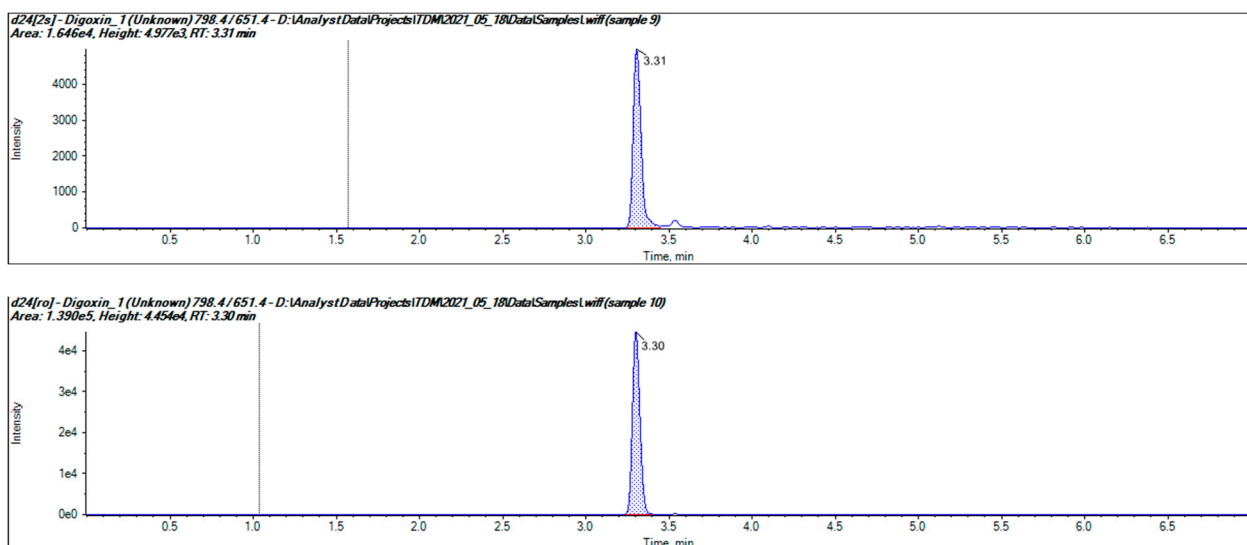

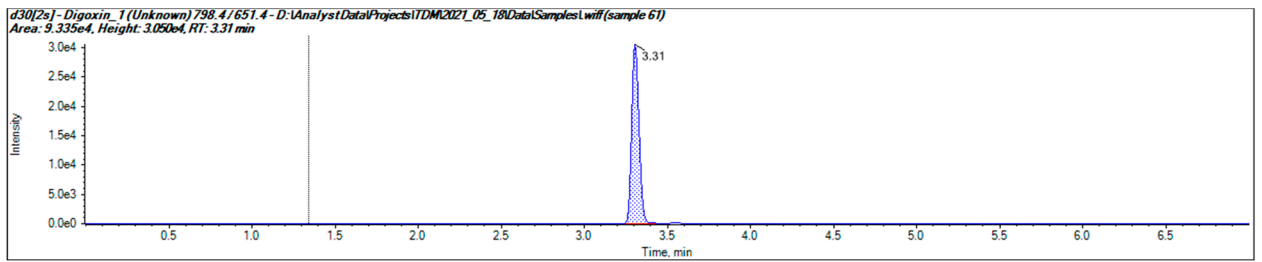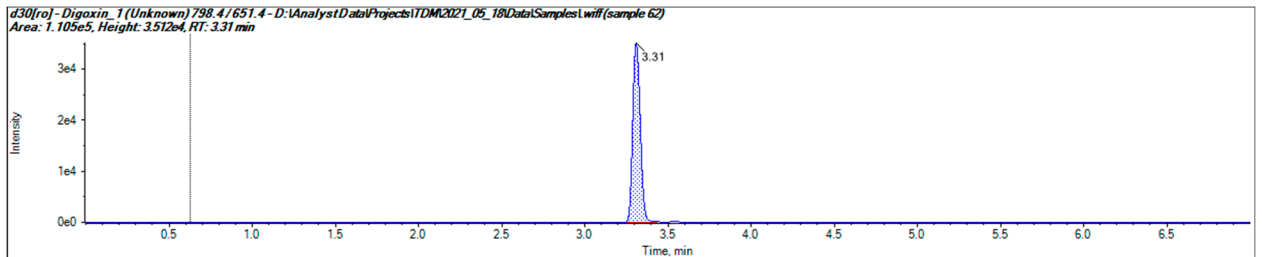

2 – Blank:

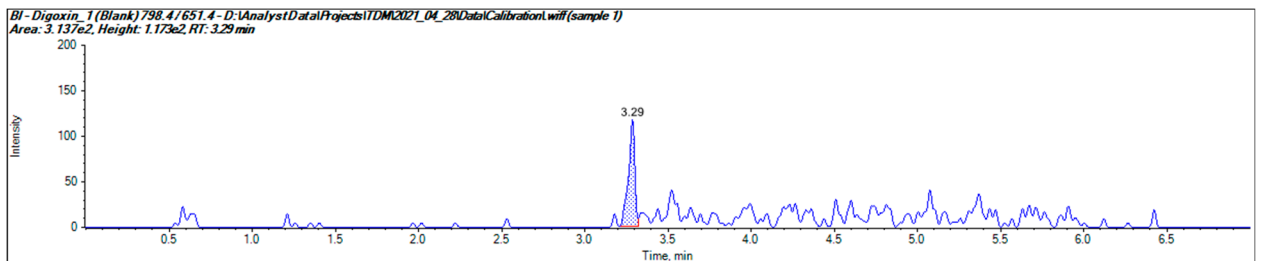

3 – Calibration levels and QC:

Cal<sub>1</sub>Digoxin=0.5 ng/ml

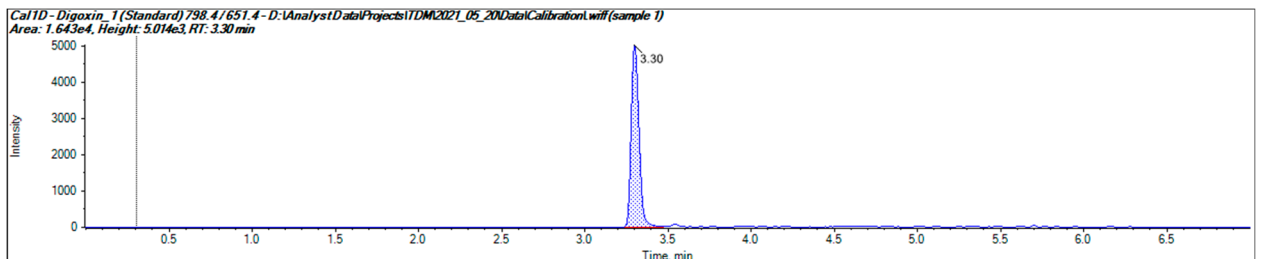

Cal<sub>7</sub>Digoxin=10 ng/ml

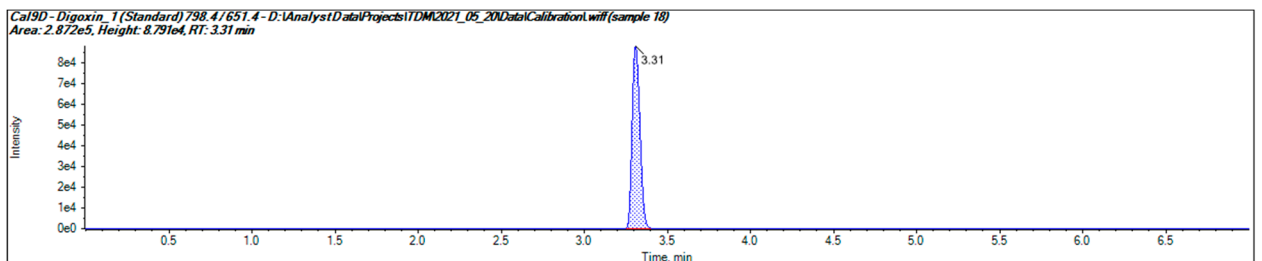

QC<sub>1</sub>Digoxin=0.6 ng/ml

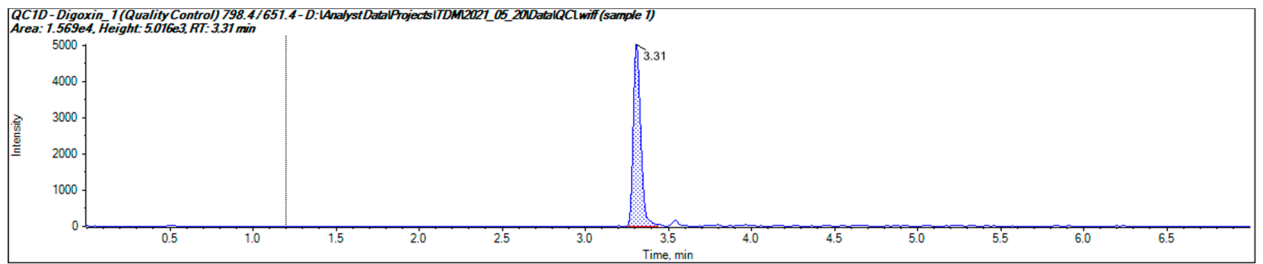

QC4Digoxin=7.5 ng/ml

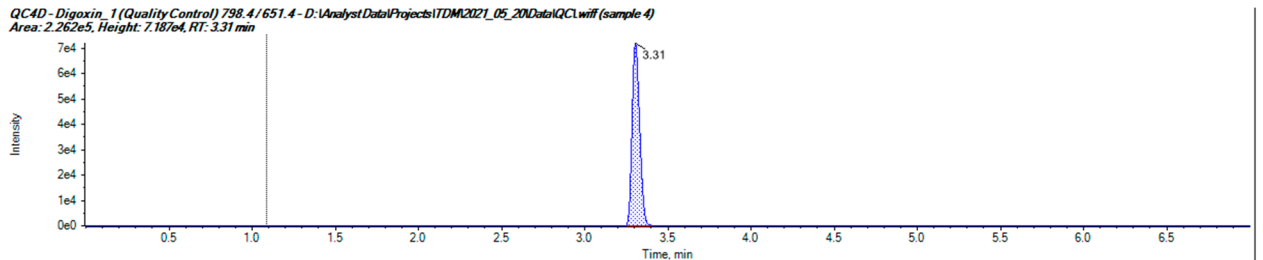

FigureS3: Calibration curve for digoxin in blood. The healthy women plasma was used as a matrix.

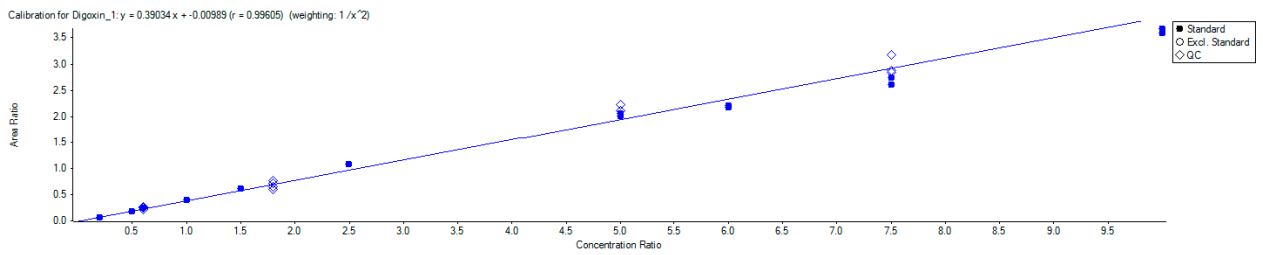

FigureS4: Chromatograms of blank and samples for digoxin on blood.

1 – Samples:

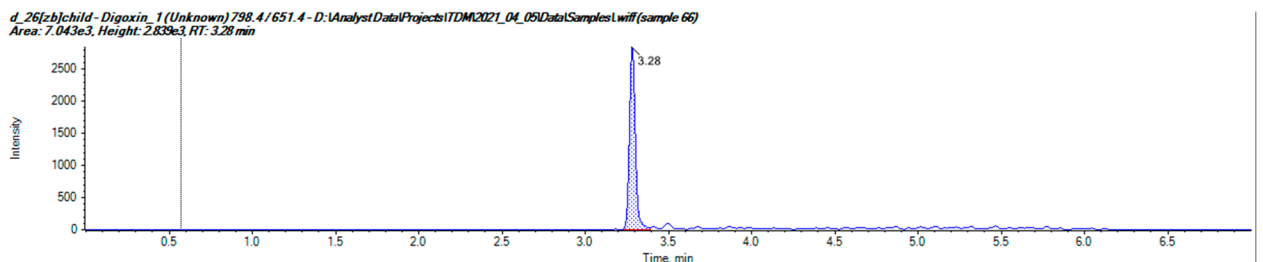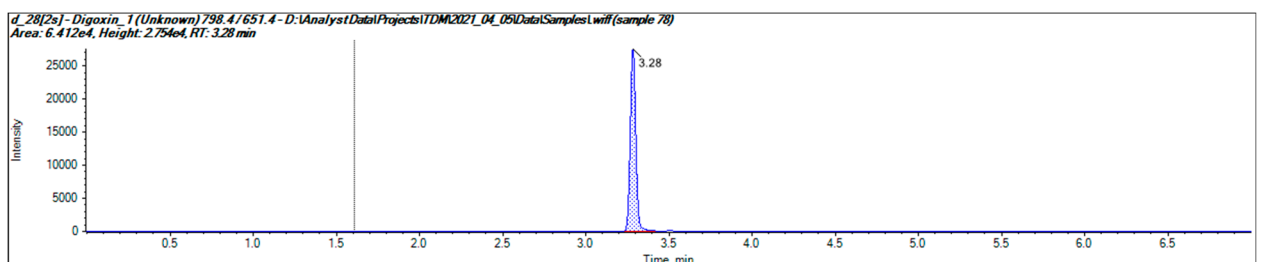

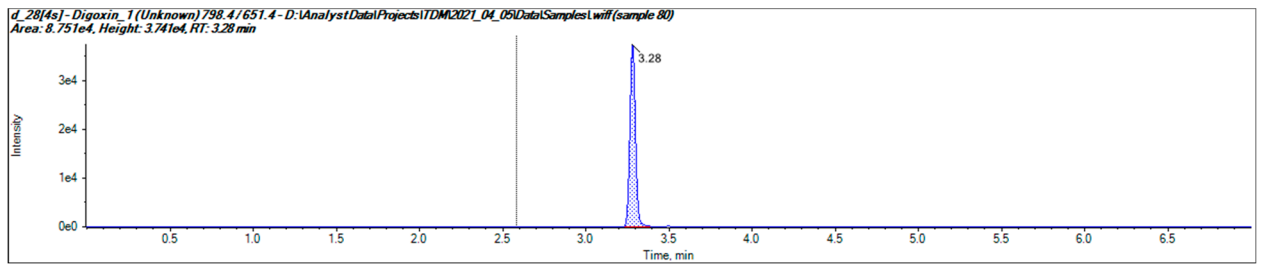

2 – Blank:

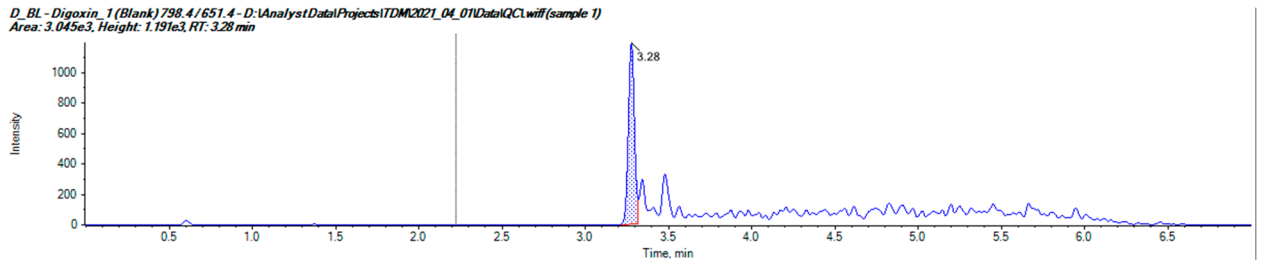

3 – Calibration levels and QC:

Cal<sub>1</sub>Digoxin=0.2 ng/ml

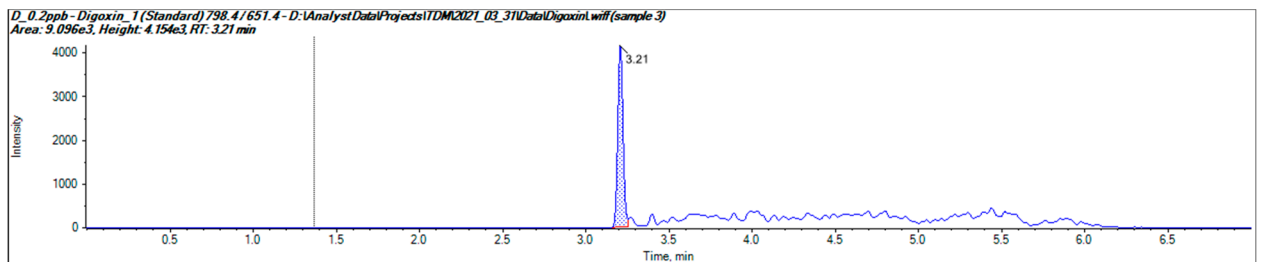

Cal<sub>2</sub>Digoxin=0.5 ng/ml

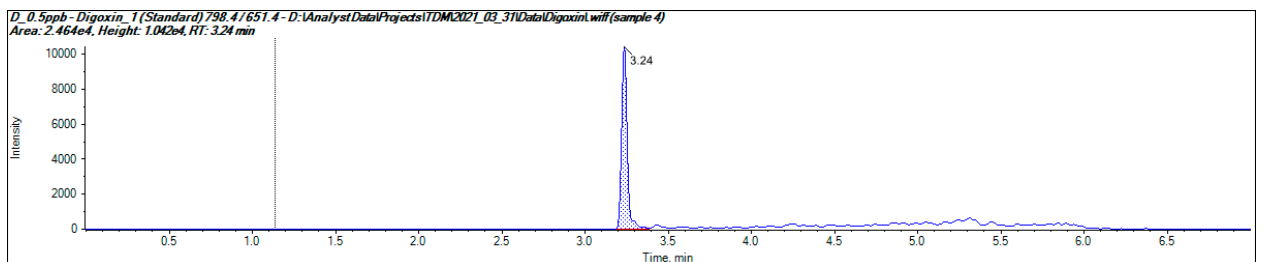

Cal<sub>3</sub>Digoxin=0.6 ng/ml

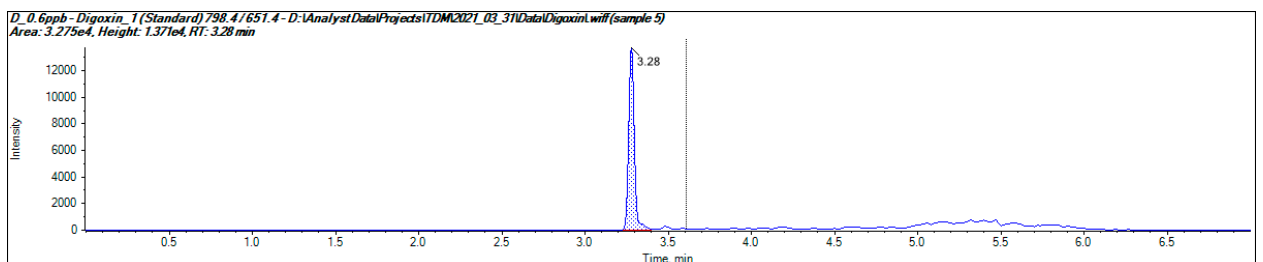

Cal<sub>1</sub>Digoxin=10 ng/ml

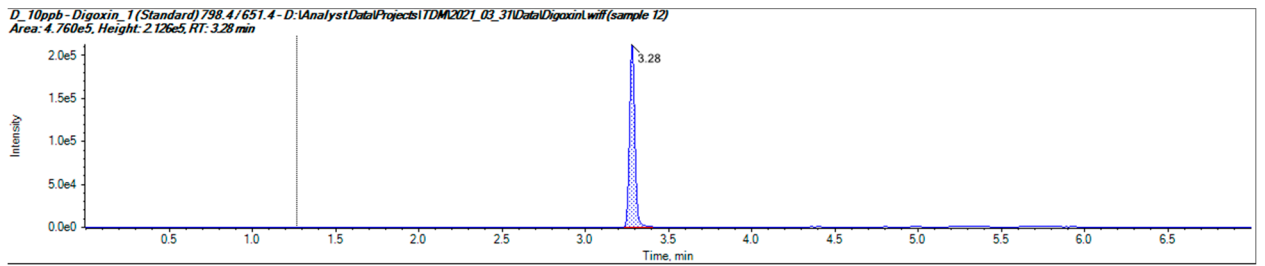

QC<sub>1</sub>Digoxin=0.6 ng/ml

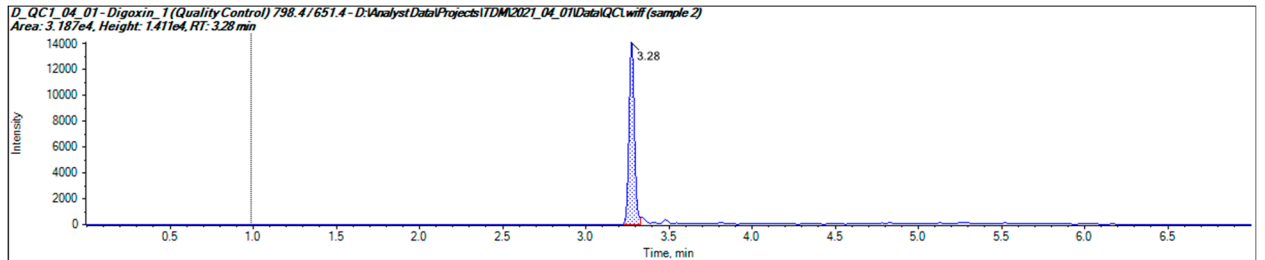

QC<sub>2</sub>Digoxin=1.8 ng/ml

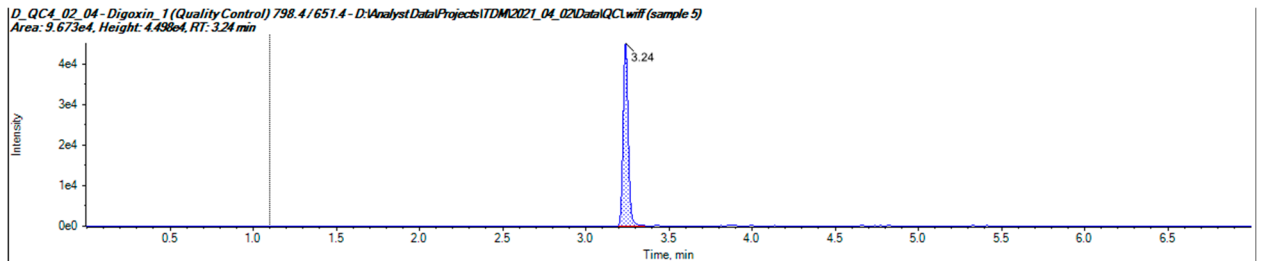

QC<sub>4</sub>Digoxin=7.5 ng/ml

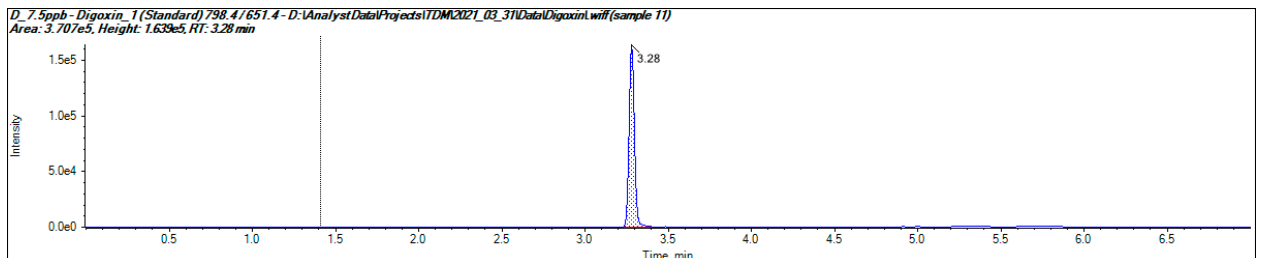

FigureS5: Calibration curve for digoxin in urine. The healthy women urine was used as a matrix.

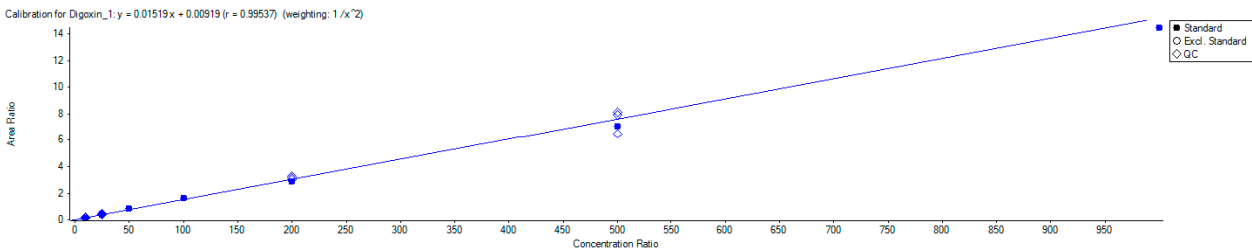

FigureS6: Chromatograms for blank and samples. The healthy women urine was used as a blank.

1 – Samples:

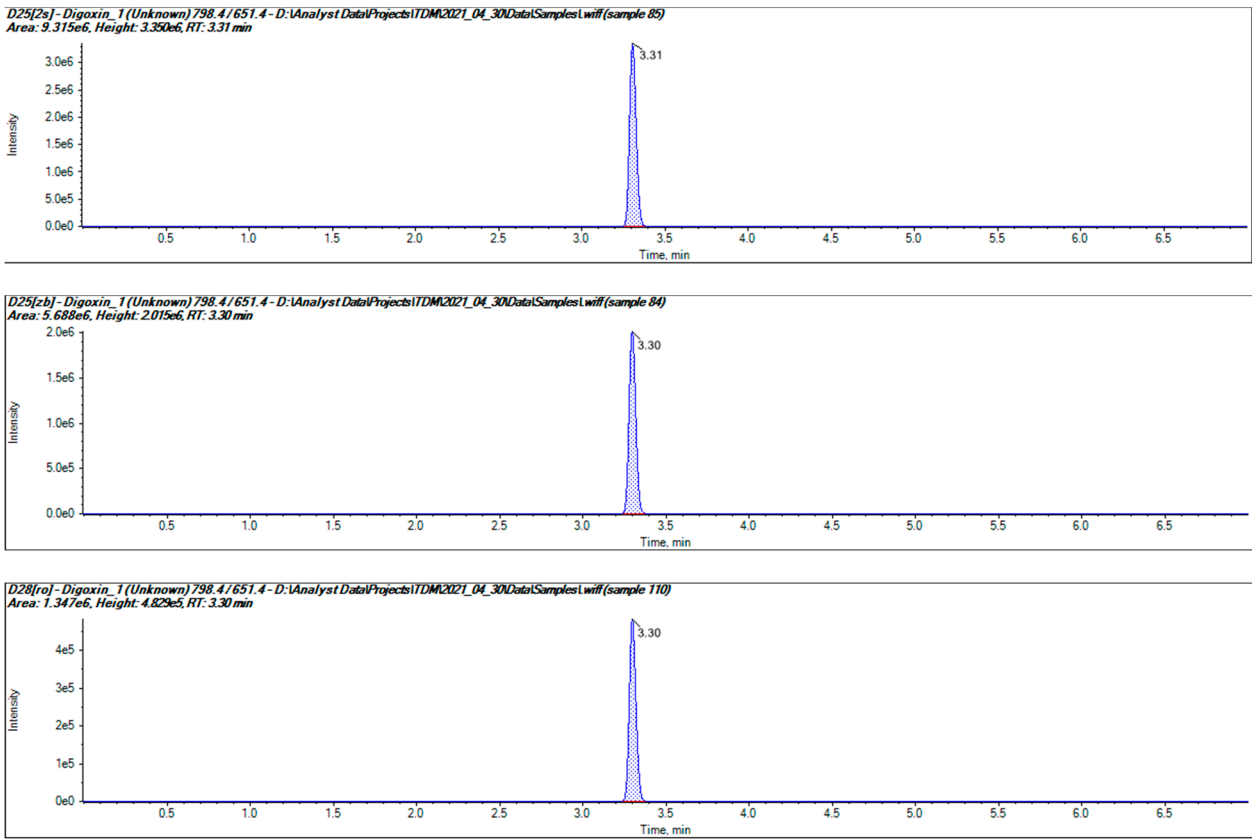

2 – Blank:

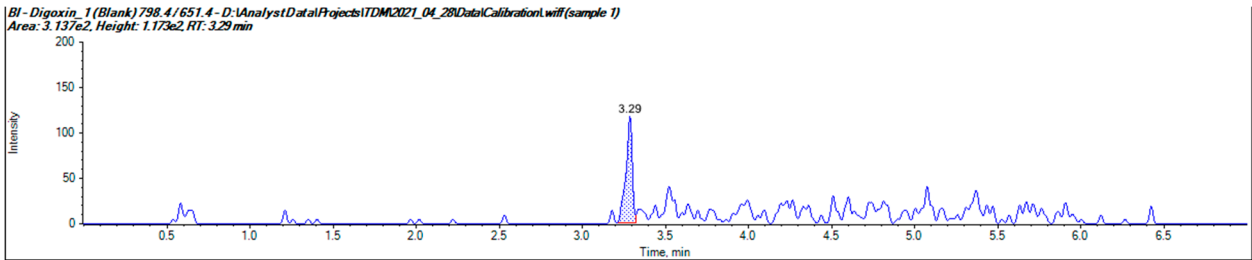

3 – Calibration levels:

Cal1D-Digoxin\_1 (Standard) 798.4/651.4 - D:\AnalystData\Projects\TDM\2021\_05\_06\Data\Calibration\wiff (sample 2)

Area: 1.309e5, Height: 4.506e4, RT: 3.30 min

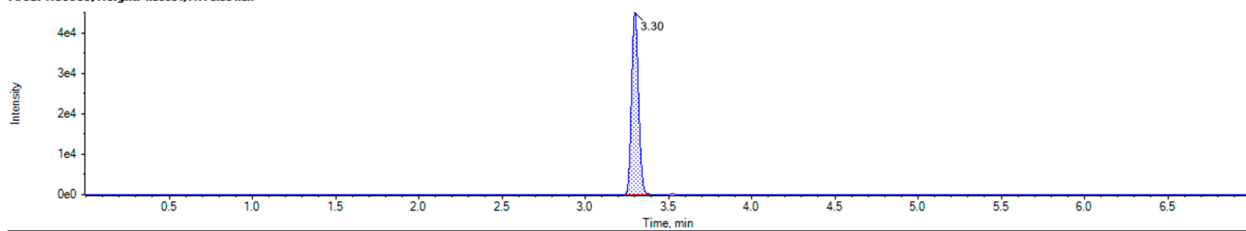

Cal1D-Digoxin\_1 (Standard) 798.4/651.4 - D:\AnalystData\Projects\TDM\2021\_05\_06\Data\Calibration\wiff (sample 9)

Area: 1.187e7, Height: 3.854e6, RT: 3.30 min

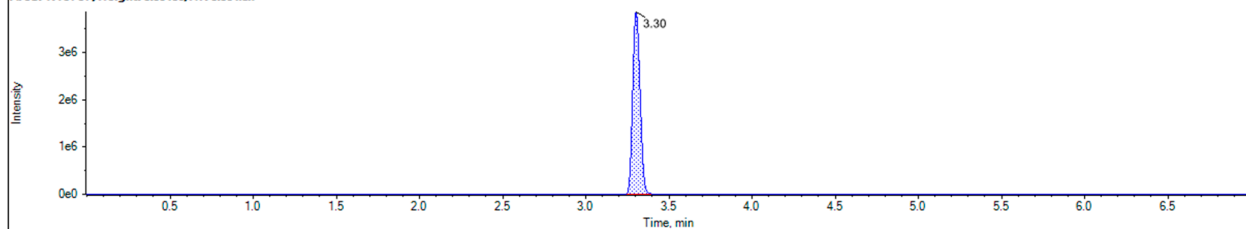

FigureS7: Calibration curve for sotalol in amniotic fluid. The healthy women urine was used as a matrix.

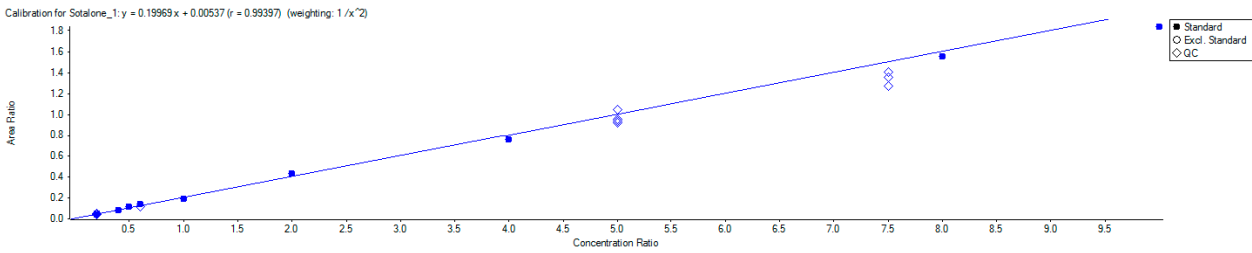

FigureS8: Chromatograms for blank and samples in amniotic fluid for sotalol. The healthy women urine was used as a blank.

1 – Samples:

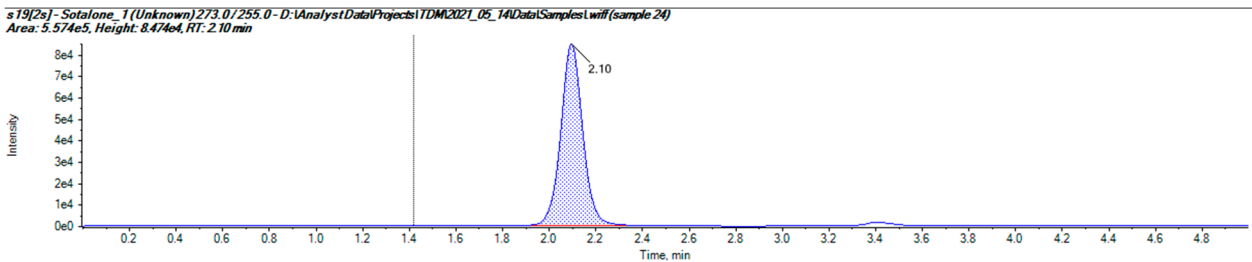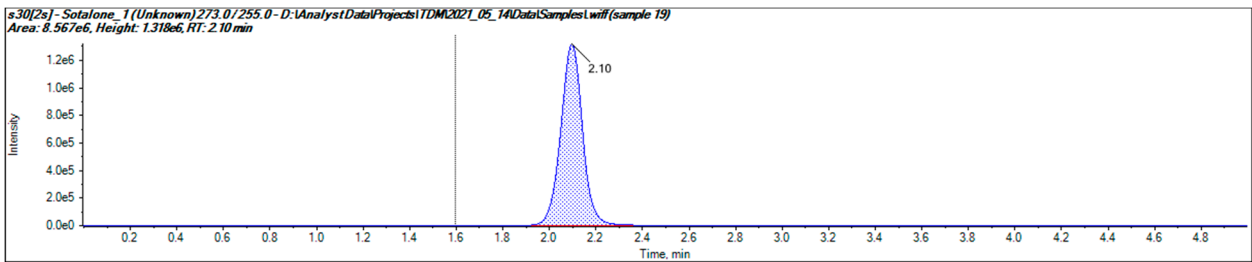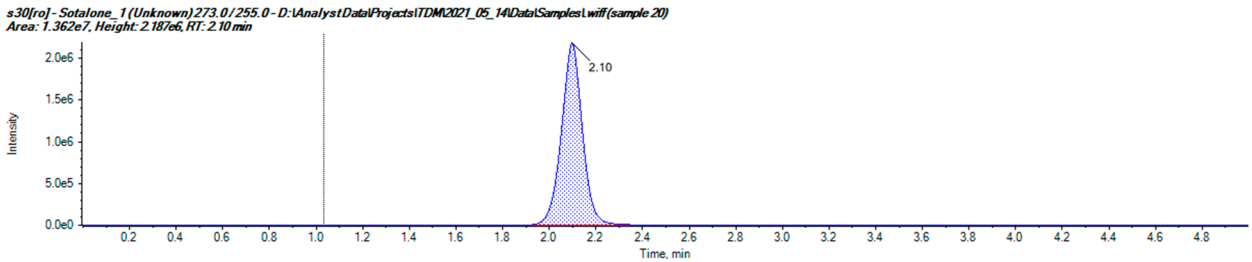

2 – Blank:

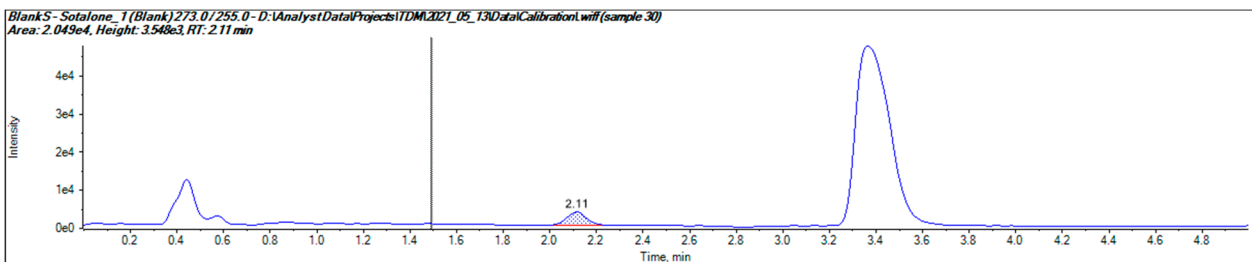

3 – Calibration levels and QC:

Cal1Sotalol=0.2 µg/ml

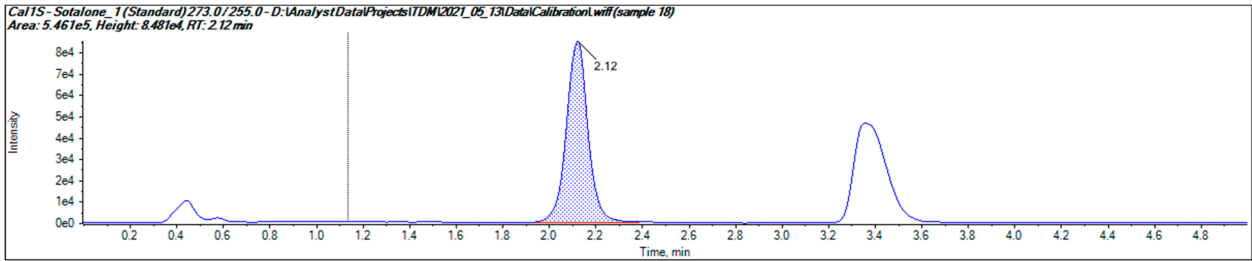

Cal9 Sotalol =10 µg/ml

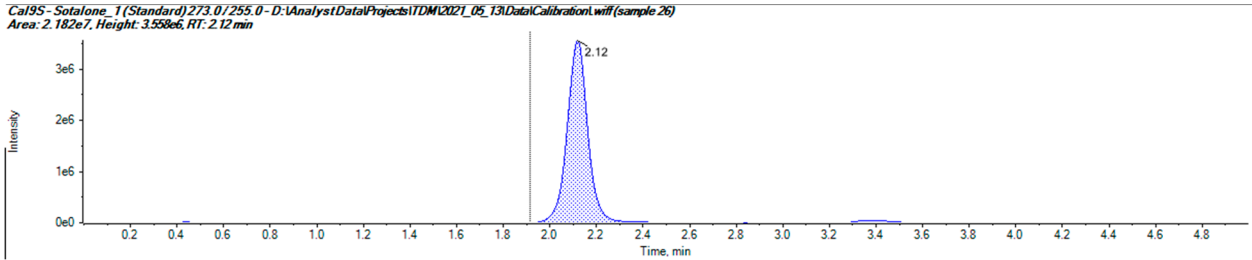

QC1Sotalol=0.2 µg/ml

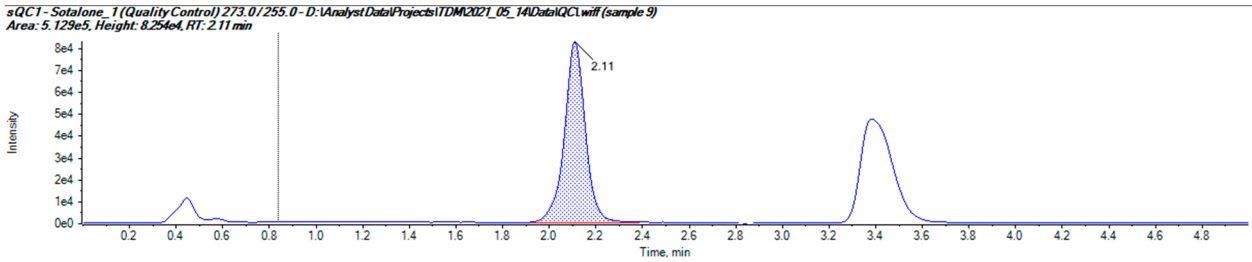

QC4Sotalol=7.5 µg/ml

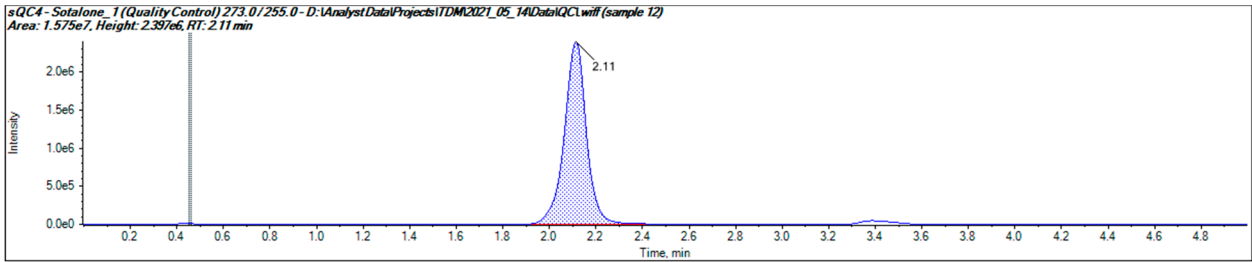

FigureS9: Calibration curve for sotalol in blood. The healthy women plasma was used as a matrix.

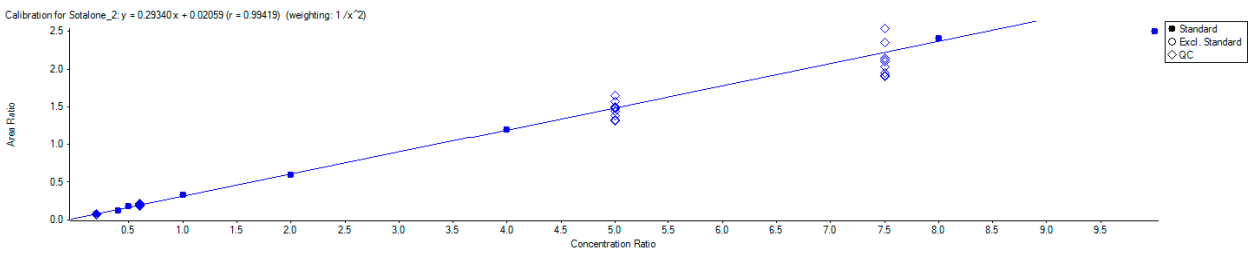

FigureS10: Chromatograms for blank and samples. The healthy women plasma was used as a blank.

1 – Samples:

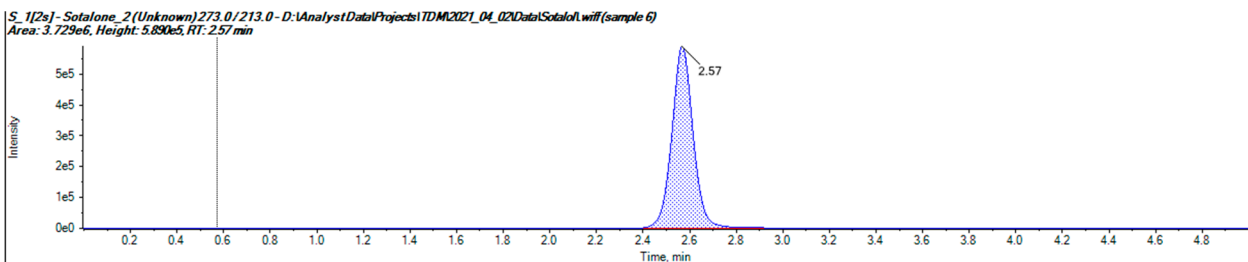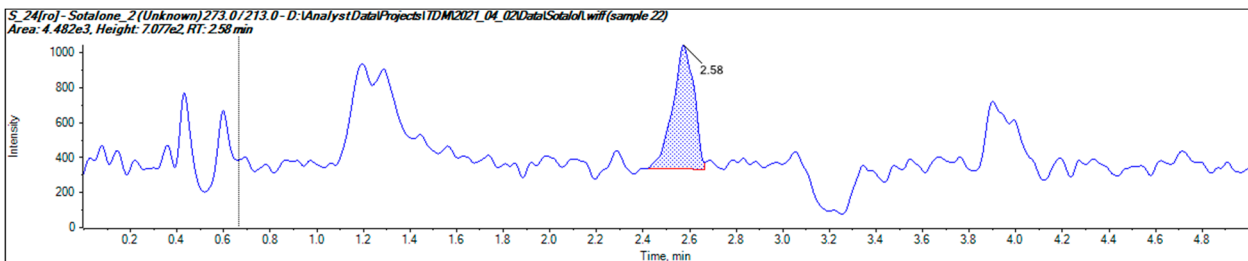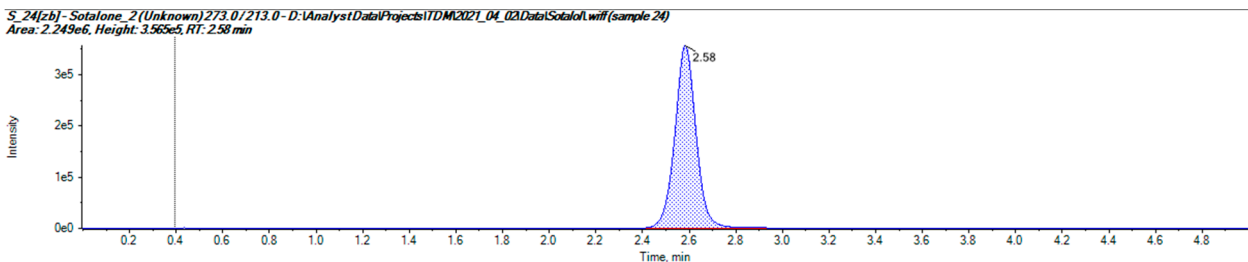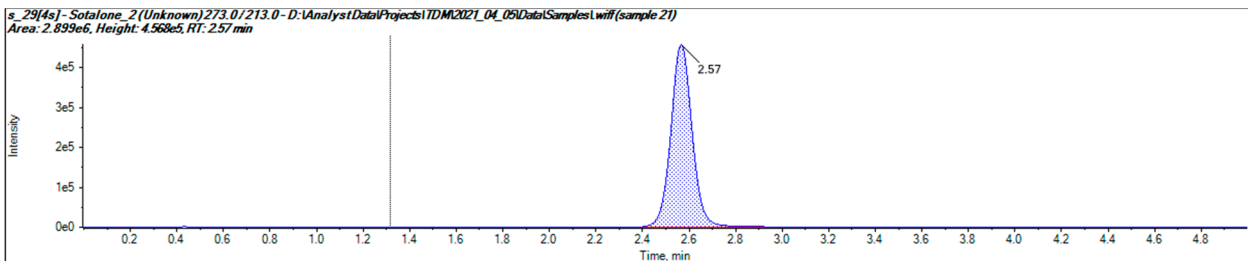

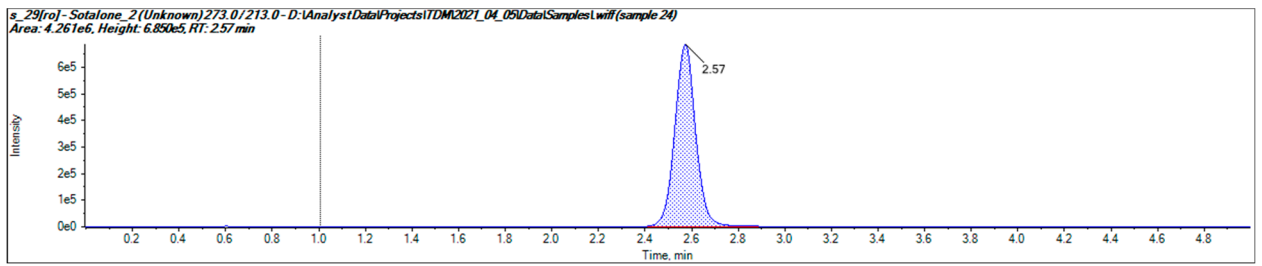

2 – Blank:

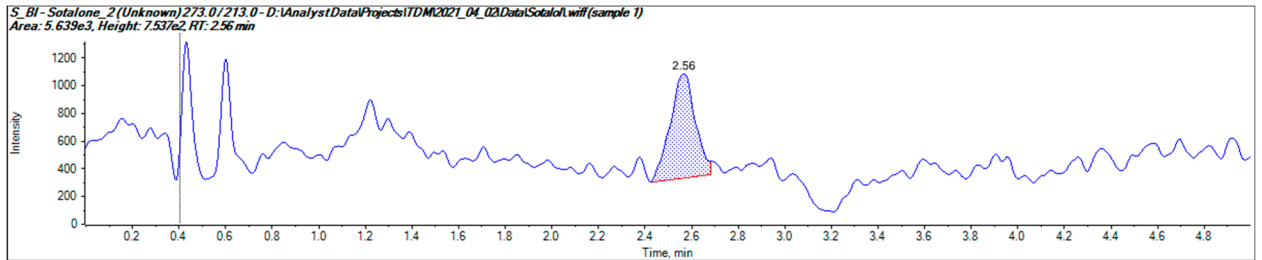

3 – Calibration levels:

Cal1Sotalol=0.2 µg/ml

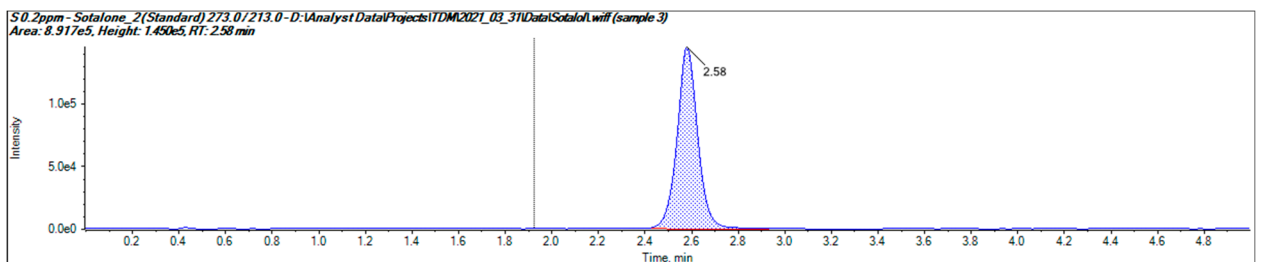

Cal9Sotalol=10 µg/ml

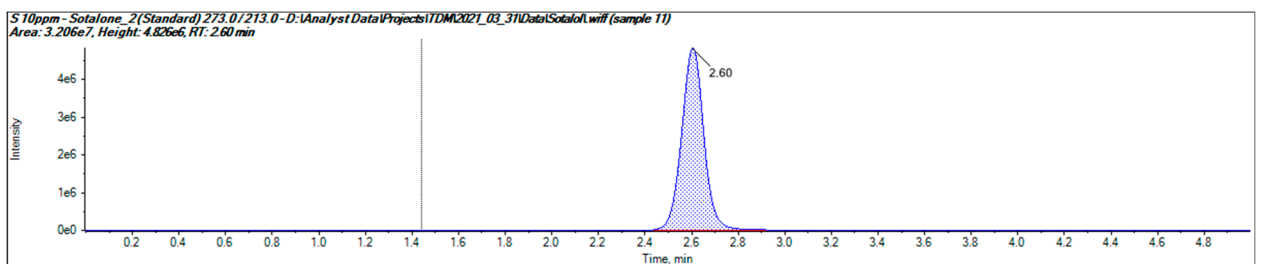

QC1Sotalol=0.2 µg

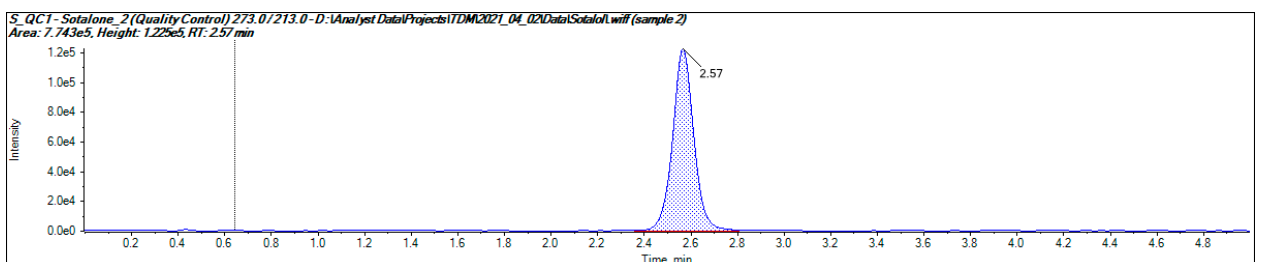

QC4Sotalol=7.5 µg/ml

S\_QC4 - Sotalone\_2 (Quality Control) 273.0/213.0-D:\Analyst Data\Projects\TDM\2021\_04\_02\Data\Sotalone.wiff (sample 5)  
Area: 2.229e7, Height: 3.37e6, RT: 2.57 min

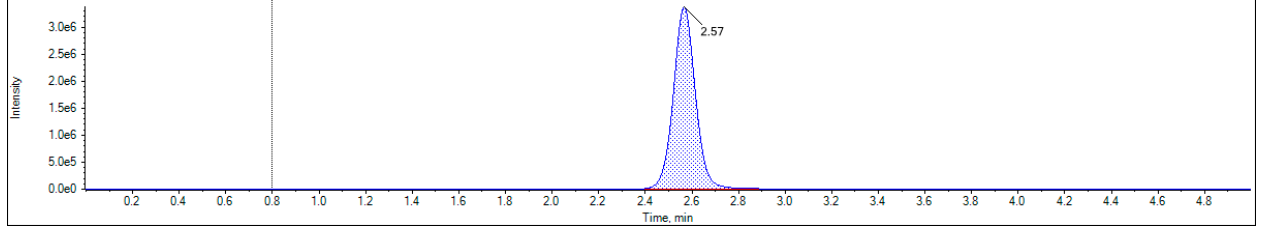

FigureS11: Calibration curve for sotalol in urine. The healthy women urine was used as a matrix.

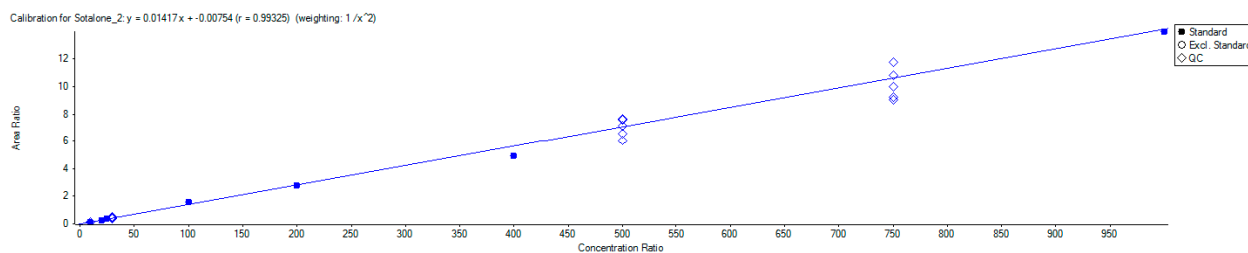

FigureS12: Chromatograms for blank and samples. The healthy women urine was used as a blank.

### 1 – Samples:

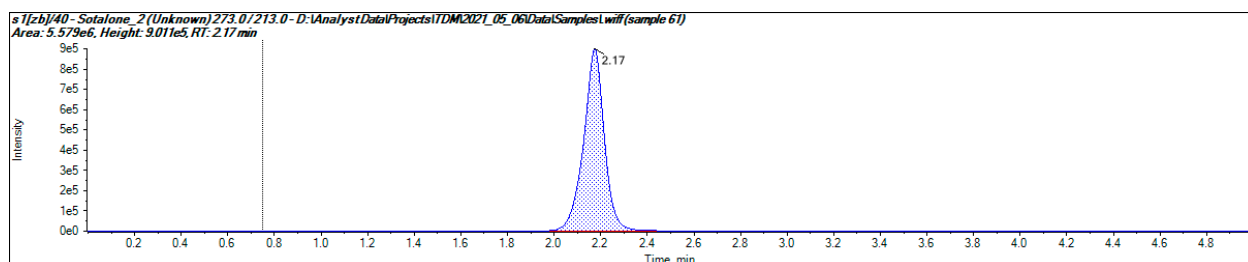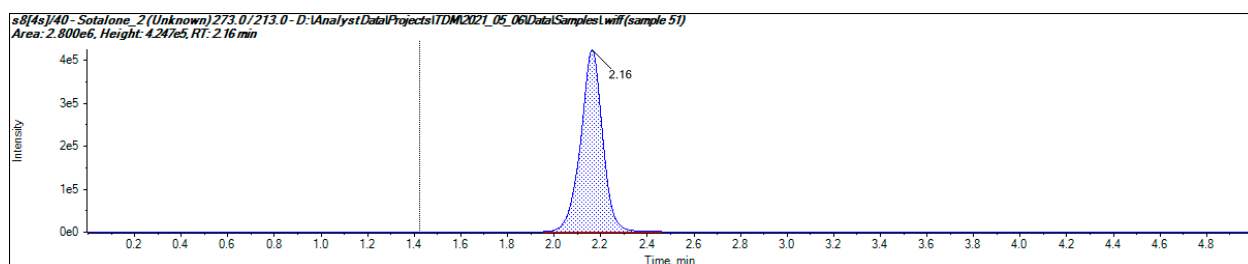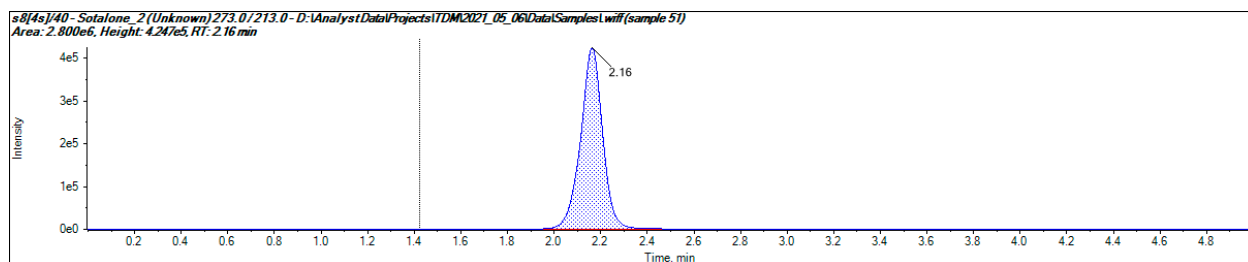

### 2 – Blank:

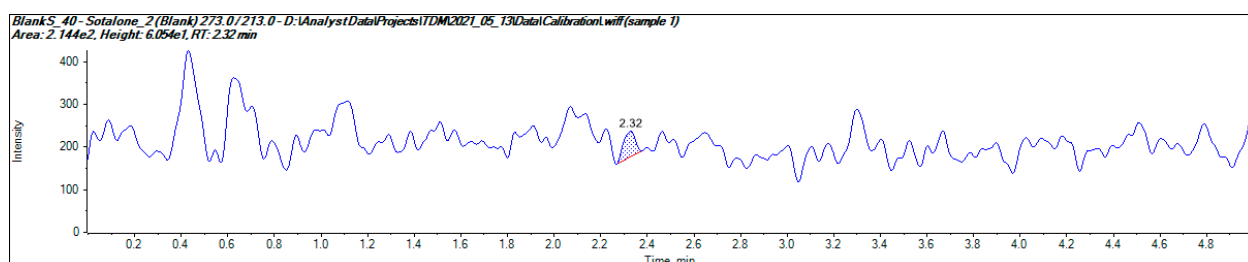

### 3 – Calibration levels:

Cal<sub>Sotalol</sub> = 10 µg/ml

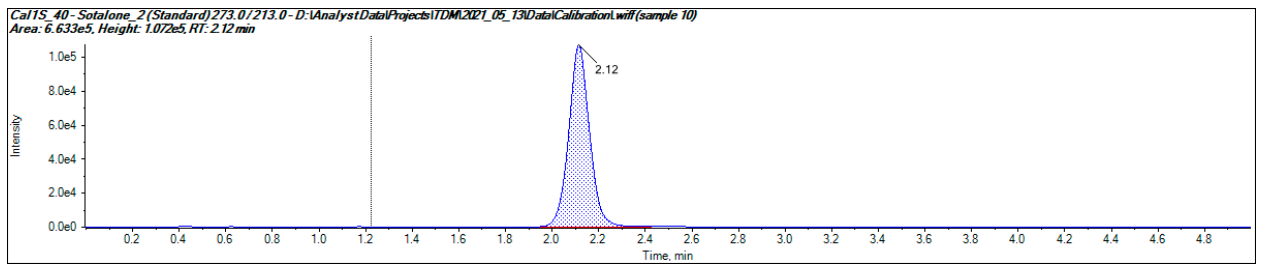

Cal7Sotalol=1000  $\mu\text{g/ml}$

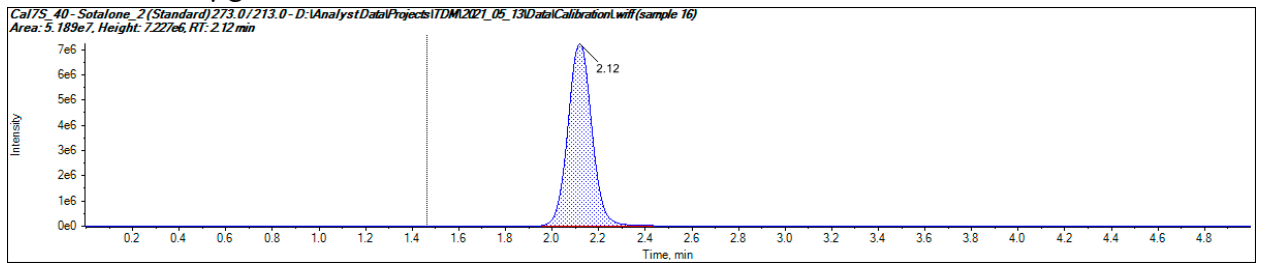

Supplement: s1 [file s1]
