# Supplementary material for: Transplacental Therapeutic Drug Monitoring in Pregnant Women with Fetal Tachyarrhythmia Using HPLC-MS/MS
Source: Int J Mol Sci. 2023 Jan 17;24(3):1848. doi: 10.3390/ijms24031848 (PMC9916042; doi:10.3390/ijms24031848)
Supplement: Supplementary file 1 [file ijms-24-01848-s001.zip › Supplementary File S2.xlsx]

## Sheet: points_time
Sample_number	Medication_start	1st_point_date	2nd_point_date	3rd_point_date	4th_point_date
11	2019-06-21	2019-06-25	2019-06-26	2019-06-28	2019-07-23
5	2019-04-21	2019-04-23	2019-04-24	2019-04-26	2019-06-17
10	2019-05-27	2019-05-29	2019-05-30	NA	NA
17	2019-11-15	2019-11-18	2019-11-19	NA	2019-11-25
4	2019-04-10	2019-04-11	2019-04-17	2019-04-18	2019-05-28
28	2020-11-05	2020-11-09	2020-11-11	2020-11-13	2021-01-11
9	2019-05-20	2019-05-23	2019-05-27	2019-05-29	2019-06-05
26	2020-10-14	2020-10-20	2020-10-23	2020-10-26	2020-11-20
27	2020-11-05	2020-11-09	2020-11-11	2020-11-13	2020-11-18
6	2019-04-25	2019-04-26	2019-04-29	2019-04-30	2019-06-10
14	2019-08-07	2019-08-09	2019-08-12	NA	NA
22	2019-12-25	2019-12-28	2019-12-30	2019-12-31	2020-02-19
21	2019-12-17	2019-12-19	2019-12-20	2019-12-23	NA
24	2020-01-15	2020-01-17	2020-03-03	2020-03-05	2020-05-21
16	2019-11-11	2019-11-13	2019-11-15	2019-11-18	2020-01-11
19	2019-11-16	2019-11-20	2019-11-25	2019-11-27	NA
1	2019-01-18	2019-01-21	2019-01-22	2019-01-30	2019-03-04
15	2019-10-13	2019-10-19	2019-10-22	2019-10-25	2019-11-22
2	2019-01-23	2019-01-25	2019-01-29	2019-02-06	2019-03-20
30	2020-12-18	2020-12-29	2020-12-29	2020-12-30	2021-01-14
23	2019-12-28	2019-12-30	2019-12-31	2020-01-17	2020-01-20
29	2020-12-16	2020-12-21	2020-12-22	2020-12-25	2020-12-30
3	2019-03-29	2019-04-01	2019-04-10	2019-04-11	2019-04-24
7	2019-05-08	2019-05-15	2019-05-16	2019-05-17	2019-07-05
8	2019-05-17	2019-05-21	2019-05-23	2019-05-27	2019-08-06
20	2019-11-15	2019-11-20	2019-11-22	2019-11-27	2020-01-24
25	2020-09-25	2020-10-15	2020-10-19	NA	2020-10-26
18	2019-11-15	2019-11-18	2019-11-20	2019-11-22	NA
12	2019-07-09	2019-07-11	2019-07-15	NA	2019-08-26
13	2019-07-10	2019-07-15	NA	NA	2019-09-19

## Sheet: abcb1_polimorfism
	ABSB1 polymorphism_type
Sample_number	pregnant_women	child
11	T/T	NA
5	C/C	C/C
10	T/C	NA
17	C/C	T/C
4	T/C	NA
28	C/C	T/C
9	T/C	T/C
26	T/C	C/C
27	T/T	T/C
6	T/C	T/C
14	T/C	NA
22	T/C	T/C
21	C/C	NA
24	T/T	T/C
16	C/C	NA
19	T/C	NA
1	T/C	C/C
15	T/T	T/T
2	T/T	T/T
30	T/C	C/C
23	C/C	T/C
29	C/C	T/C
3	T/C	NA
7	T/C	NA
8	T/T	NA
20	C/C	T/C
25	C/C	T/C
18	T/T	NA
12	T/C	NA
13	T/T	T/T

## Sheet: digoxin_concentration_1_point
Sample_number	dosage_1_mg	data_blood_sample	blood, ng_ml	data_urine_sample	urine_ng_ml
4	0.75	2019-04-11	1.5	2019-04-11	420
22	0.75	2019-12-28	1.6	2019-12-28	660
21	0.75	2019-12-19	1.3	2019-12-19	960
20	0.75	2019-11-20	0.99	NA	NA
25	0.75	2020-10-15	1.2	2020-10-16	460
28	0.75	2020-11-09	1.3	2020-11-09	670
9	0.75	2019-05-23	1.4	2019-05-23	380
24	0.75	2020-01-17	1	2020-01-17	520
26	0.75	2020-10-20	0.75	2020-10-20	370
11	0.75	2019-06-25	2.1	2019-06-25	580
18	0.75	2019-11-18	1.4	2019-11-18	280
10	0.75	2019-05-29	3.1	2019-05-29	380
5	0.75	2019-04-23	1.9	2019-04-23	270
12	0.75	2019-07-11	1.3	2019-07-11	440
16	0.75	2019-11-13	1.9	2019-11-13	480
27	0.75	2020-11-09	2	2020-11-09	630
17	0.75	2019-11-18	1.6	2019-11-18	320
19	0.75	2019-11-20	2.6	2019-11-20	910
6	0.75	2019-04-26	2.2	2019-04-26	740
14	1	2019-08-09	0.98	2019-08-09	290
8	0.75	2019-05-21	1.9	2019-05-21	950
23	0.75	2020-01-17	0.1	2019-12-30	720
1	0.75	2019-01-21	1.4	2019-01-21	940
3	0.75	2019-04-01	1.1	2019-04-01	610
15	0.75	2019-10-19	1.9	2019-10-19	1200
2	0.75	2019-01-25	0.85	2019-01-25	440
7	0.75	2019-05-15	2.6	2019-05-15	1500
30	0.75	2020-12-29	1.3	2020-12-29	560
13	0.75	2019-07-15	1.8	2019-07-15	350
29	0.75	2020-12-21	0.48	2020-12-21	280

## Sheet: digoxin_concentration_2_point
Sample_number	dosage_2_mg	data_blood_sample	blood_ng_ml	data_urine_sample	urine_ng_ml	data_amniotic_sample	amniotic_ng_ml
4	0.75	2019-04-17	1.4	2019-04-17	850	2019-04-11	1.1
22	0.75	2019-12-30	1.4	2019-12-30	530	2019-12-30	1.7
21	0.75	2019-12-20	1.4	2019-12-20	360	2019-12-20	3.3
20	0.75	2019-11-22	1.7	2019-11-22	430	2019-11-25	2.1
25	0.75	2020-10-19	0.66	2020-10-19	740	NA	NA
28	0.75	2020-11-11	1.7	2020-11-11	580	2020-11-09	1.5
9	0.75	2019-05-27	3.6	2019-05-27	1100	2019-05-23	2.3
24	0.75	2020-03-03	2	2020-03-03	990	2020-01-17	0.4
26	0.75	2020-10-23	2	2020-10-23	600	2020-10-20	1.9
11	0.75	2019-06-26	1.9	2019-06-26	600	2019-06-26	5.2
18	0.75	2019-11-20	2.3	2019-11-20	710	NA	NA
10	0.75	2019-05-30	1.8	2019-05-30	680	2019-05-30	7.1
5	0.75	2019-04-24	1.7	2019-04-24	590	2019-04-24	2.2
12	0.75	2019-07-15	1.5	2019-07-15	440	NA	NA
16	0.75	2019-11-15	1.7	2019-11-15	610	2019-11-15	1.4
27	0.75	2020-11-11	1.7	2020-11-11	520	2020-11-09	7
17	0.75	2019-11-25	2.2	2019-11-25	910	NA	NA
19	0.75	2019-11-25	1.7	2019-11-25	1200	2019-11-25	1.9
6	0.75	2019-04-29	1.2	2019-04-29	230	2019-04-26	1.3
14	1	2019-08-12	2.6	2019-08-12	430	2019-08-09	5.4
8	0.75	2019-05-23	1.9	2019-05-23	1300	2019-05-20	1.2
23	0.75	2019-12-31	1.6	2019-12-31	850	2019-12-30	3
1	0.75	2019-01-22	0.96	2019-01-22	920	2019-01-22	1.8
3	0.5	2019-04-10	1.5	2019-04-10	360	NA	NA
15	0.75	2019-10-21	1.7	2019-10-21	950	2019-10-22	6
2	0.5	2019-01-29	1.5	2019-01-29	660	2019-01-29	3.3
7	0.75	2019-05-16	2.4	2019-05-16	780	2019-05-15	3.7
30	0.75	2020-12-29	1.1	2020-12-29	510	2020-12-29	3.2
13	0	NA	NA	NA	NA	NA	NA
29	0.75	2020-12-22	0.36	2020-12-22	260	2020-12-22	1.5

## Sheet: digoxin_concentration_3_point
Sample_number	dosage_3_mg	data_blood_sample	blood_ng_ml	data_urine_sample	urine_ng_ml
4	0.75	2019-04-18	2	2019-04-18	940
22	0.75	2019-12-31	2.1	2019-12-31	1200
21	0.75	2019-12-23	2	2019-12-23	1000
20	0.75	2019-11-27	2.1	2019-11-27	1000
25	0	NA	NA	NA	NA
28	0.75	2020-11-13	2.4	2020-11-13	900
9	0.75	2019-05-29	2.1	2019-05-29	1300
24	0.75	2020-03-05	1.4	2020-03-05	630
26	0.75	2020-10-26	1.5	2020-10-26	400
11	0.75	2019-06-28	1.4	2019-06-28	1100
18	0.75	2019-11-22	2	2019-11-22	210
10	0	NA	NA	NA	NA
5	0.75	2019-04-26	1.7	2019-04-26	810
12	0.75	NA	NA	NA	NA
16	0.75	2019-11-18	1.9	2019-11-18	660
27	0.75	2020-11-13	2.2	2020-11-13	830
17	0	NA	NA	NA	NA
19	0.75	2019-11-27	2.4	2019-11-27	570
6	0.75	2019-04-30	2.2	2019-04-30	480
14	0	NA	NA	NA	NA
8	0.75	2019-05-27	2.4	2019-05-27	510
23	0.5	2020-01-17	1.6	2020-01-17	590
1	0.25	2019-01-30	0.58	2019-01-30	0
3	0.5	2019-04-11	1.3	2019-04-11	750
15	0.5	2019-10-25	1.5	2019-10-25	400
2	0.5	2019-02-06	1.8	2019-02-06	290
7	0.75	2019-05-17	2.6	2019-05-17	750
30	0.75	2020-12-30	1.5	2020-12-30	310
13	0	NA	NA	NA	NA
29	0.75	2020-12-25	1.7	2020-12-25	1100

## Sheet: digoxin_concentration_4_point
Sample_number	dosage_4_mg	data_blood_sample	blood_ng_ml	data_urine_sample	urine_ng_ml	data_amniotic_sample	amniotic_ng_ml	data_baby_blood_sample	baby_blood_ng_ml
4	0	2019-05-29	NA	2019-05-29	NA	2019-05-29	NA	NA	NA
22	0.75	NA	NA	NA	NA	NA	NA	2020-02-19	NA
21	?	NA	NA	NA	NA	NA	NA	2020-10-26	NA
20	0.5	NA	NA	NA	NA	NA	NA	2020-01-24	NA
25	0.5	NA	NA	NA	NA	NA	NA	2020-10-26	NA
28	0.75	2021-01-11	0.58	2021-01-11	110	2021-01-11	3.9	2021-01-11	0.22
9	0.75	2019-06-05	1.5	2019-06-05	420	2019-06-05	4.6	2019-06-05	0.7
24	0.75	2020-05-21	0.98	2020-05-21	490	2020-05-21	4.5	2020-05-21	0.42
26	0.5	2020-11-20	0.1	2020-11-20	340	2020-11-20	2.5	2020-11-20	0
11	0.75	NA	NA	NA	NA	NA	NA	NA	NA
18	0	NA	NA	NA	NA	NA	NA	NA	NA
10	0	NA	NA	NA	NA	NA	NA	NA	NA
5	0.75	2019-06-17	0.57	2019-06-17	330	2019-06-17	3.7	2019-06-17	0.62
12	0.75	NA	NA	NA	NA	NA	NA	NA	NA
16	0.5	NA	NA	NA	NA	NA	NA	NA	NA
27	0.25	2020-11-18	2.1	2020-11-18	420	2020-11-18	15	2020-11-18	1.1
17	0.75	2019-11-19	1.4	NA	NA	2019-11-19	4	2019-11-19	0.42
19	0	NA	NA	NA	NA	NA	NA	NA	NA
6	0.25	2019-06-10	0.82	2019-06-10	230	2019-06-10	4.9	2019-06-10	0.1
14	0	NA	NA	NA	NA	NA	NA	NA	NA
8	0.5	NA	NA	NA	NA	NA	NA	NA	NA
23	0.5	2020-01-20	1.6	2020-01-20	1200	2020-01-20	4.4	2020-01-20	0.44
1	0.25	2019-03-04	0	2019-03-04	0	2019-03-04	0	2019-03-04	0
3	0.5	NA	NA	NA	NA	NA	NA	NA	NA
15	0.5	2019-11-22	0.73	2019-11-22	160	2019-11-22	4.5	2019-11-22	0.28
2	0.5	2019-03-20	1.2	2019-03-20	350	2019-03-20	6.7	2019-03-20	0.73
7	0.5	NA	NA	NA	NA	NA	NA	NA	NA
30	0.5	2021-01-14	2.7	2021-01-14	700	2021-01-14	3.4	2021-01-14	0.86
13	0.5	2019-09-19	0.59	2019-09-19	240	2019-09-19	3	2019-09-19	0.1
29	0.75	2020-12-30	0.8	2020-12-30	510	2020-12-30	4.4	2020-12-30	0.2

## Sheet: sotalol_concentration_1_point
Sample_number	dosage_1_mg	data_blood_sample	blood_mkg_ml	data_urine_sample	urine_mkg_ml
4	0	2019-04-11	NA	2019-04-11	NA
22	240	2019-12-28	0.73	2019-12-28	54
21	320	2019-12-19	1.5	2019-12-19	320
20	240	2019-11-20	1.2	NA	NA
25	160	2020-10-15	1	2020-10-16	220
28	0	2020-11-09	NA	2020-11-09	NA
9	0	2019-05-23	NA	2019-05-23	NA
24	320	2020-01-17	0.65	2020-01-17	100
26	0	2020-10-20	NA	2020-10-20	NA
11	0	2019-06-25	NA	2019-06-25	NA
18	0	2019-11-18	NA	2019-11-18	NA
10	0	2019-05-29	NA	2019-05-29	NA
5	0	2019-04-23	NA	2019-04-23	NA
12	0	2019-07-11	NA	2019-07-11	NA
16	0	2019-11-13	NA	2019-11-13	NA
27	0	2020-11-09	NA	2020-11-09	NA
17	0	2019-11-18	NA	2019-11-18	NA
19	0	2019-11-20	NA	2019-11-20	NA
6	0	2019-04-26	NA	2019-04-26	NA
14	0	2019-08-09	NA	2019-08-09	NA
8	80	2019-05-21	0	2019-05-21	0
23	160	2020-01-17	0.36	2019-12-30	69
1	160	2019-01-21	0.34	2019-01-21	100
3	160	2019-04-01	1.1	2019-04-01	230
15	360	2019-10-19	0.73	2019-10-19	340
2	320	2019-01-25	1.1	2019-01-25	310
7	360	2019-05-15	2.1	2019-05-15	630
30	320	2020-12-29	0.23	2020-12-29	56
13	160	2019-07-15	0.78	2019-07-15	23
29	400	2020-12-21	1.8	2020-12-21	380

## Sheet: sotalol_concentration_2_point
Sample_number	sotalol_2_mg	data_blood_sample	blood_mkg_ml	data_urine_sample	urine_mkg_ml	data_amniotic_sample	amniotic_mkg_ml
4	0	2019-04-17	NA	2019-04-17	NA	2019-04-11	NA
22	240	2019-12-30	2.2	2019-12-30	480	2019-12-30	5.1
21	320	2019-12-20	1.3	2019-12-20	210	2019-12-20	5.8
20	240	2019-11-22	0.93	2019-11-22	150	2019-11-25	3.2
25	160	2020-10-19	0.3	2020-10-19	130	NA	NA
28	0	2020-11-11	NA	2020-11-11	NA	2020-11-09	NA
9	0	2019-05-27	0.36	2019-05-27	NA	2019-05-23	NA
24	400	2020-03-03	2.2	2020-03-03	620	2020-01-17	0.78
26	0	2020-10-23	NA	2020-10-23	NA	2020-10-20	NA
11	0	2019-06-26	NA	2019-06-26	NA	2019-06-26	NA
18	0	2019-11-20	NA	2019-11-20	NA	NA	NA
10	0	2019-05-30	NA	2019-05-30	NA	2019-05-30	NA
5	0	2019-04-24	NA	2019-04-24	NA	2019-04-24	NA
12	0	2019-07-15	NA	2019-07-15	NA	NA	NA
16	120	2019-11-15	0.1	2019-11-15	24	2019-11-15	0.9
27	160	2020-11-11	0.67	2020-11-11	850	2020-11-09	0
17	0	2019-11-25	1.3	2019-11-25	1000	NA	NA
19	160	2019-11-25	0	2019-11-25	0	2019-11-25	0.21
6	160	2019-04-29	0.48	2019-04-29	14	2019-04-26	0
14	160	2019-08-12	0	2019-08-12	0	2019-08-09	0
8	160	2019-05-23	0.54	2019-05-23	170	2019-05-20	0
23	160	2019-12-31	0.55	2019-12-31	770	2019-12-30	2.5
1	160	2019-01-22	1.2	2019-01-22	220	2019-01-22	2.5
3	240	2019-04-10	1.6	2019-04-10	67	NA	NA
15	360	2019-10-21	2.3	2019-10-21	460	2019-10-22	4.8
2	360	2019-01-29	1	2019-01-29	190	2019-01-29	3.9
7	0	2019-05-16	0.33	2019-05-16	88	2019-05-15	3.4
30	320	2020-12-29	0.33	2020-12-29	53	2020-12-29	4
13	0	NA	NA	NA	NA	NA	NA
29	400	2020-12-22	1.2	2020-12-22	130	2020-12-22	4.7

## Sheet: sotalol_concentration_3_point
Sample_number	dosage_3_mg	data_blood_sample	blood_mkg_ml	data_urine_sample	urine_mkg_ml
4	0	2019-04-18	NA	2019-04-18	NA
22	240	2019-12-31	0.79	2019-12-31	160
21	320	2019-12-23	2.4	2019-12-23	330
20	320	2019-11-27	0.8	2019-11-27	230
25	0	NA	NA	NA	NA
28	0	2020-11-13	NA	2020-11-13	NA
9	0	2019-05-29	NA	2019-05-29	NA
24	480	2020-03-05	2.9	2020-03-05	600
26	0	2020-10-26	NA	2020-10-26	NA
11	0	2019-06-28	NA	2019-06-28	NA
18	0	2019-11-22	NA	2019-11-22	NA
10	0	NA	NA	NA	NA
5	160	2019-04-26	0.26	2019-04-26	68
12	0	NA	NA	NA	NA
16	240	2019-11-18	0.29	2019-11-18	790
27	160	2020-11-13	0.87	2020-11-13	120
17	0	NA	NA	NA	NA
19	160	2019-11-27	1.1	2019-11-27	160
6	160	2019-04-30	0.38	2019-04-30	16
14	0	NA	NA	NA	NA
8	160	2019-05-27	0	2019-05-27	48
23	120	2020-01-17	0.41	2020-01-17	25
1	80	2019-01-30	0.3	2019-01-30	220
3	240	2019-04-11	2	2019-04-11	410
15	360	2019-10-25	2.1	2019-10-25	190
2	400	2019-02-06	2	2019-02-06	170
7	0	2019-05-17	0.1	2019-05-17	20
30	320	2020-12-30	1.5	2020-12-30	98
13	0	NA	NA	NA	NA
29	400	2020-12-25	1	2020-12-25	130

## Sheet: sotalol_concentration_4_point
Sample_number	dosage_4_mg	data_blood_sample	blood_mkg_ml	data_urine_sample	urine_mkg_ml	data_amniotic_sample	amniotic_mkg_ml	data_baby_blood_sample	baby_blood_mkg_ml
4	0	2019-05-29	NA	2019-05-29	NA	2019-05-29	NA	NA	NA
22	0	NA	NA	NA	NA	NA	NA	2020-02-19	NA
21	?	NA	NA	NA	NA	NA	NA	2020-10-26	0
20	400	NA	NA	NA	NA	NA	NA	2020-01-24	0
25	160	NA	NA	NA	NA	NA	NA	2020-10-26	0
28	0	2021-01-11	NA	2021-01-11	NA	2021-01-11	NA	2021-01-11	NA
9	0	2019-06-05	NA	2019-06-05	NA	2019-06-05	NA	2019-06-05	NA
24	0	2020-05-21	NA	2020-05-21	NA	2020-05-21	NA	2020-05-21	NA
26	160	2020-11-20	0.1	2020-11-20	790	2020-11-20	1.7	2020-11-20	0.1
11	0	NA	NA	NA	NA	NA	NA	NA	NA
18	0	NA	NA	NA	NA	NA	NA	NA	NA
10	0	NA	NA	NA	NA	NA	NA	NA	NA
5	240	2019-06-17	0.27	2019-06-17	110	2019-06-17	2.9	2019-06-17	0.27
12	0	NA	NA	NA	NA	NA	NA	NA	NA
16	40	NA	NA	NA	NA	NA	NA	NA	NA
27	80	2020-11-18	0.33	2020-11-18	20	2020-11-18	4.7	2020-11-18	0.32
17	360	2019-11-19	0	NA	NA	2019-11-19	0	2019-11-19	0
19	0	NA	NA	NA	NA	NA	NA	NA	NA
6	80	2019-06-10	0	2019-06-10	12	2019-06-10	0.87	2019-06-10	0.1
14	0	NA	NA	NA	NA	NA	NA	NA	NA
8	40	NA	NA	NA	NA	NA	NA	NA	NA
23	120	2020-01-20	0	2020-01-20	21	2020-01-20	0.43	2020-01-20	0
1	80	2019-03-04	0.1	2019-03-04	24	2019-03-04	1.6	2019-03-04	0.1
3	200	NA	NA	NA	NA	NA	NA	NA	NA
15	240	2019-11-22	0.59	2019-11-22	53	2019-11-22	3.1	2019-11-22	0.63
2	400	2019-03-20	1.9	2019-03-20	220	2019-03-20	5.8	2019-03-20	1.2
7	0	NA	NA	NA	NA	NA	NA	NA	NA
30	360	2021-01-14	1	2021-01-14	190	2021-01-14	6.3	2021-01-14	1.3
13	40	2019-09-19	0	2019-09-19	13	2019-09-19	0.95	2019-09-19	0
29	400	2020-12-30	1.8	2020-12-30	390	2020-12-30	5.2	2020-12-30	1.1
